# Supplementary material
Source: publisher site journal article supplement (https://www.dovepress.com/article/449606)
Supplement: Supplementary file 1 [file get_supplementary_file.php]

**Supplementary file**

**Recombinant human heavy chain ferritin nanoparticles serve as ROS scavengers for the treatment of ischemic stroke**

**
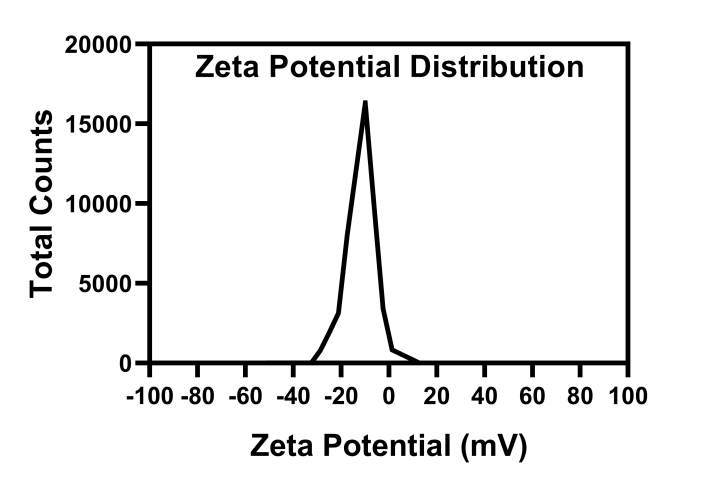
**

**Figure S1** Zeta-potential distribution of the rHF nanoparticles in assembly buffer. The zeta potential of rHF nanoparticles in the assembly buffer was −11.73 ± 1.05 mV.
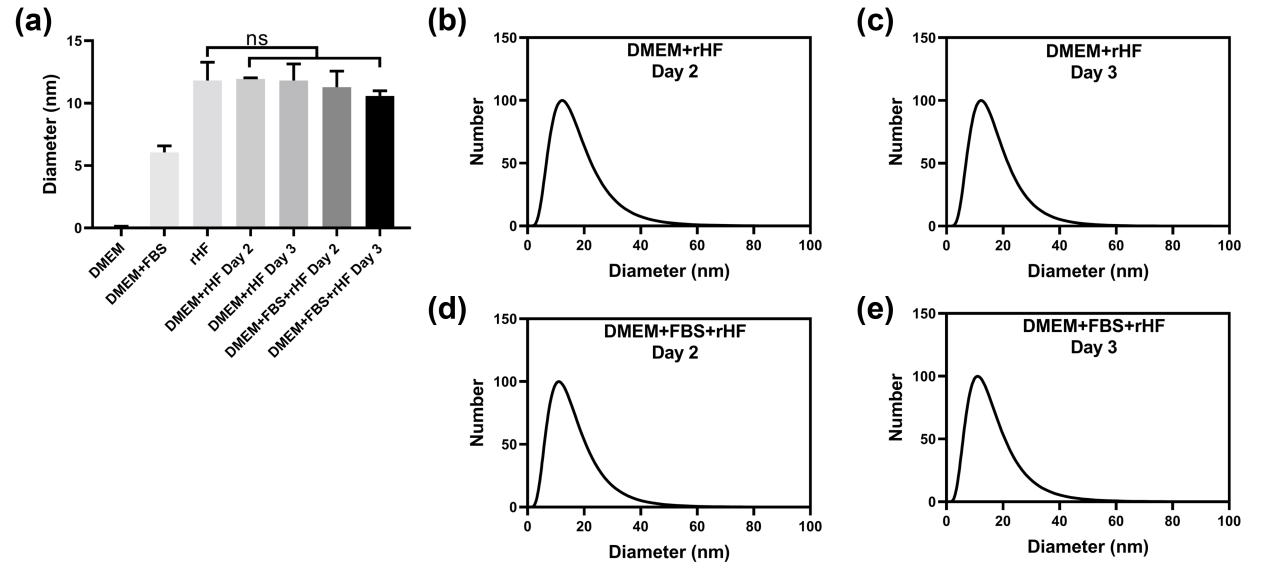


**Figure S2** The stability of rHF nanoparticles *in vitro*. (**a**) Hydrodynamic size analysis for rHF nanoparticles after being incubated in DMEM or DMEM with 10% FBS for 2 days or 3 days. (**b**) DLS analysis in number for rHF nanoparticles after being incubated in DMEM medium for 2 days. (**c**) DLS analysis in number for rHF nanoparticles after being incubated in DMEM medium for 3 days. (**d**) DLS analysis in number for rHF nanoparticles after being incubated in DMEM with 10% FBS for 2 days. (**e**) DLS analysis in number for rHF nanoparticles after being incubated in DMEM with 10% FBS for 3 days.


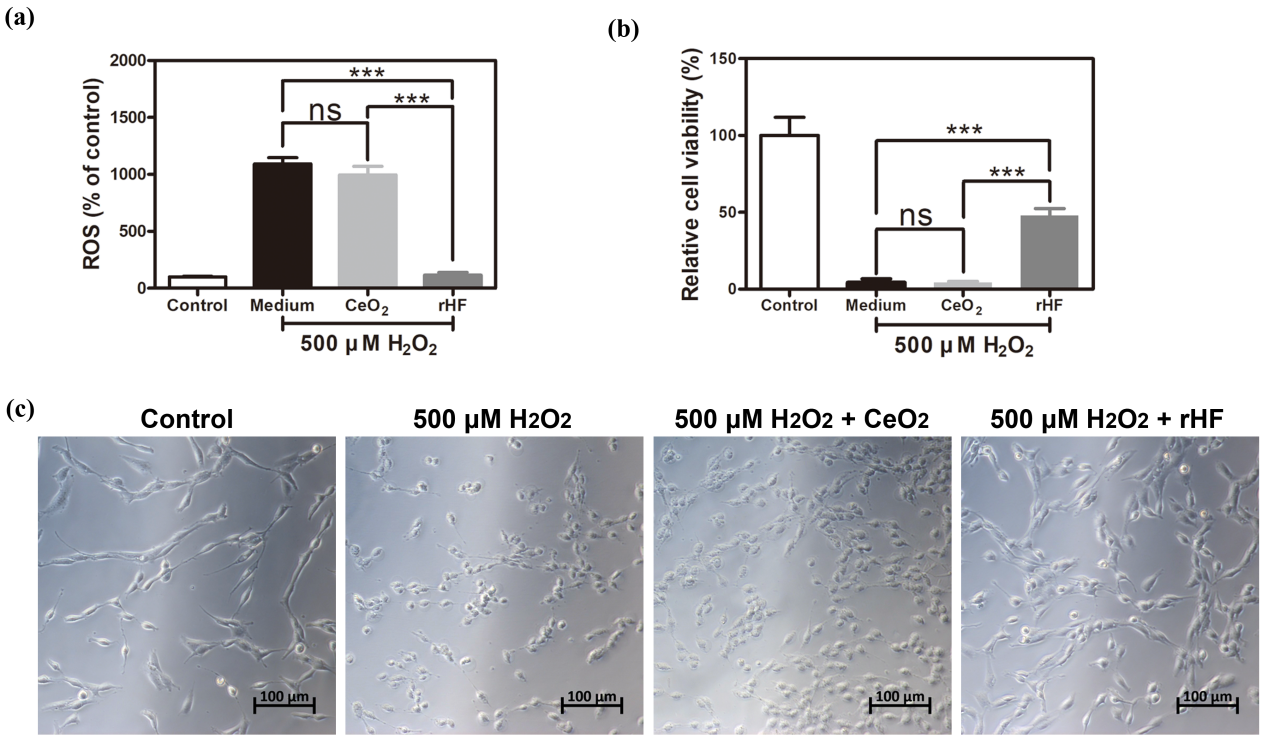


**Figure S3** Comparison of ROS scavenging effects of rHF and equivalent dose of CeO2 in PC12 cells.(**a**) Relative ROS in PC12 cells after treatment with H2O2 (500 μM) and rHF (20 μg/mL) or CeO2 (20 μg/mL) for 2 h (*n* = 4). (**b**) Relative cell viability of PC12 cells post-treatment with H2O2 (500 μM) and rHF (20 μg/mL) or CeO2 (20 μg/mL) for 24 h (*n* = 4). (**c**) Representative photomicrographs of PC12 cells post-treatment with H2O2 (500 μM) and different samples for 2 h, Scale bar = 100 μm. ****P* < 0.001 and ns means no significant difference.


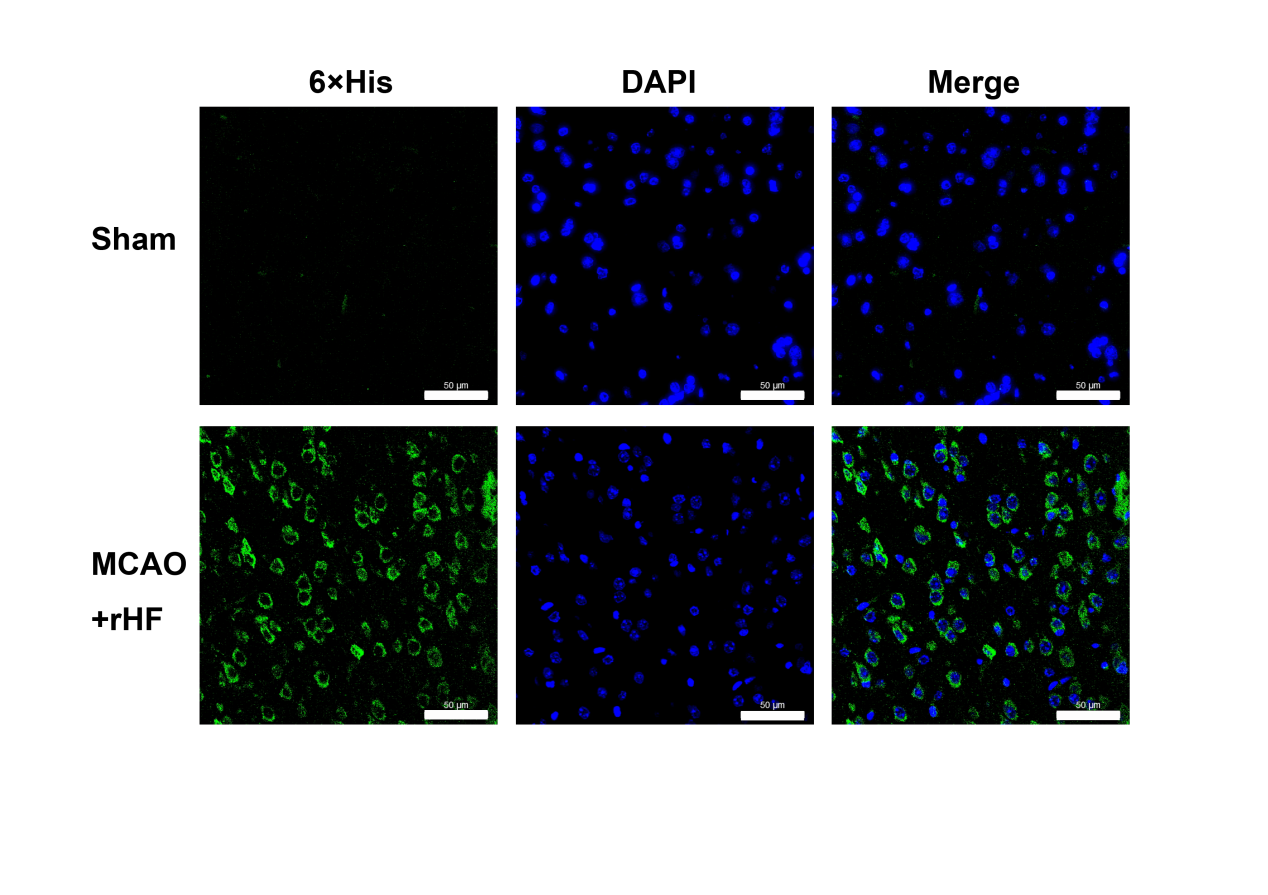


**Figure S4** Detection of 6×His tag labeled rHF in the brain tissue of MCAO mice after intravenous injection by IF, Scale bar = 50 μm.


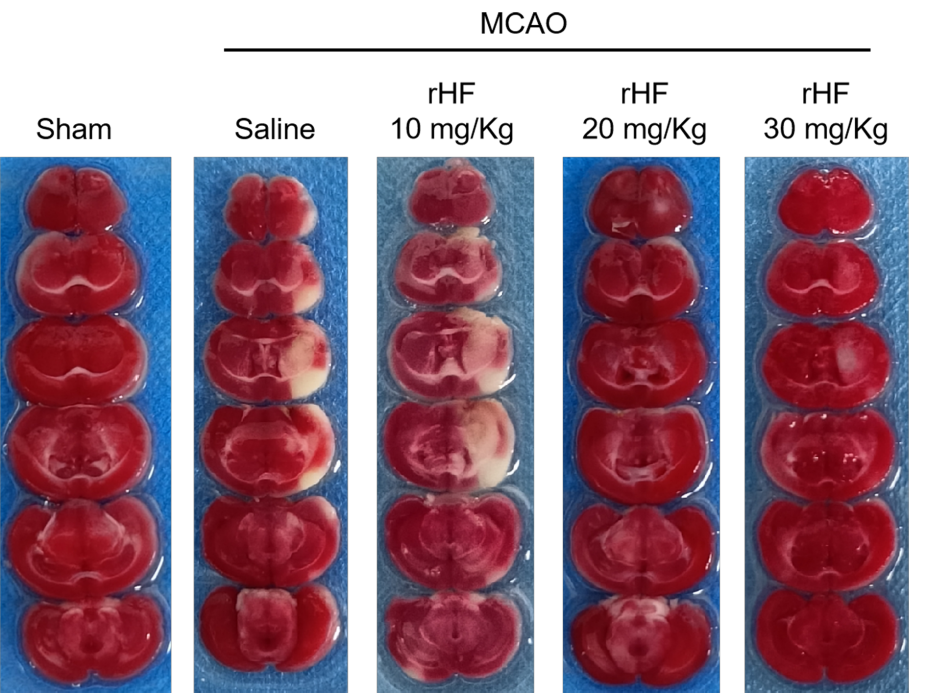


**Figure S5** Representative photographs of TTC-stained brain slices from sham or MCAO mice after treatments with different concentrations of rHF (0, 10, 20, and 30 mg/kg) for 2 days (*n* = 2).


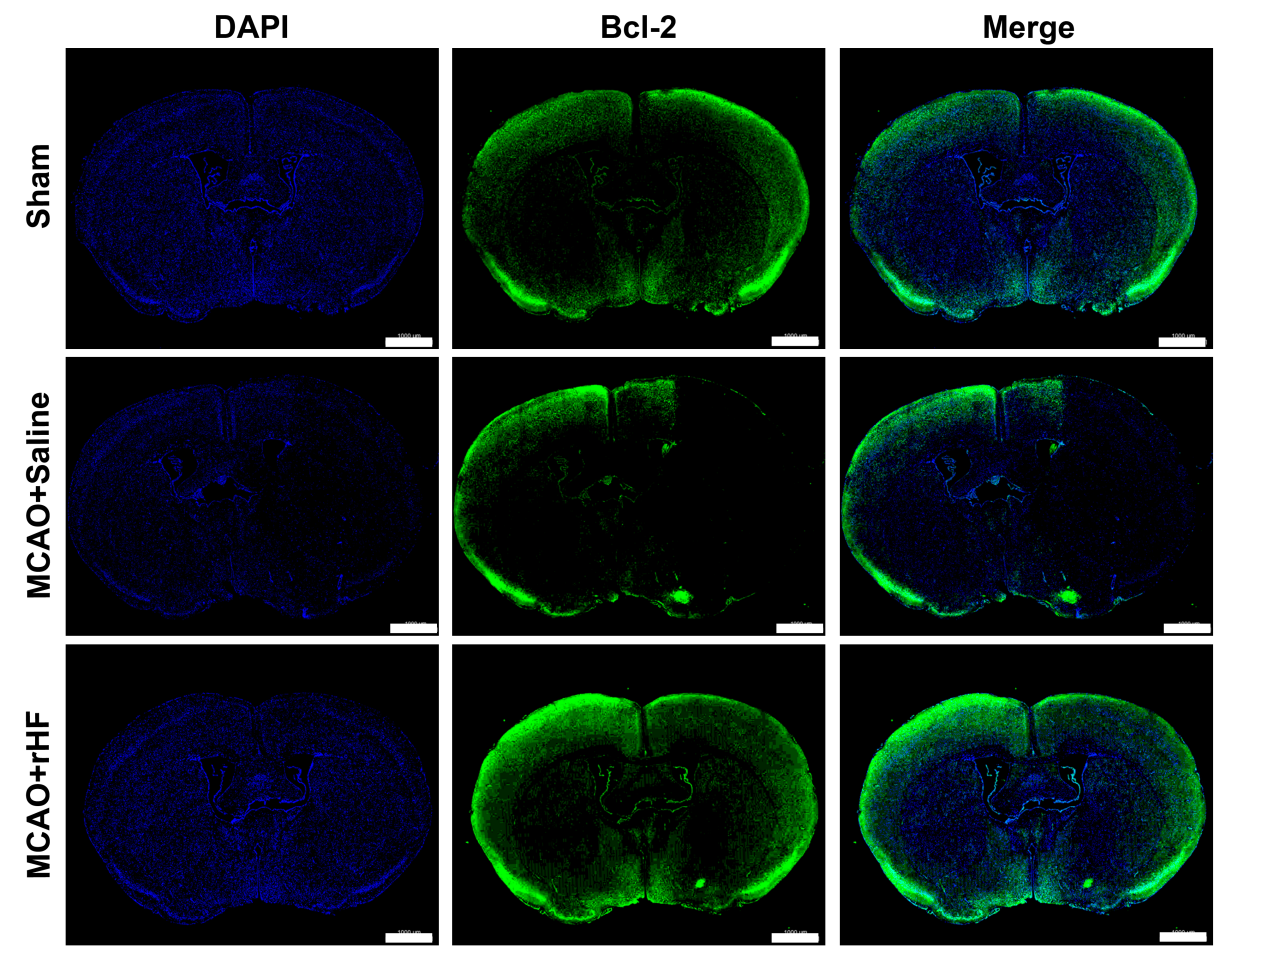


**Figure S6** Bcl-2 expression in wide-scan IF staining images of brain sections from different treatment groups (*n* = 3), Scale bar = 1000 μm.


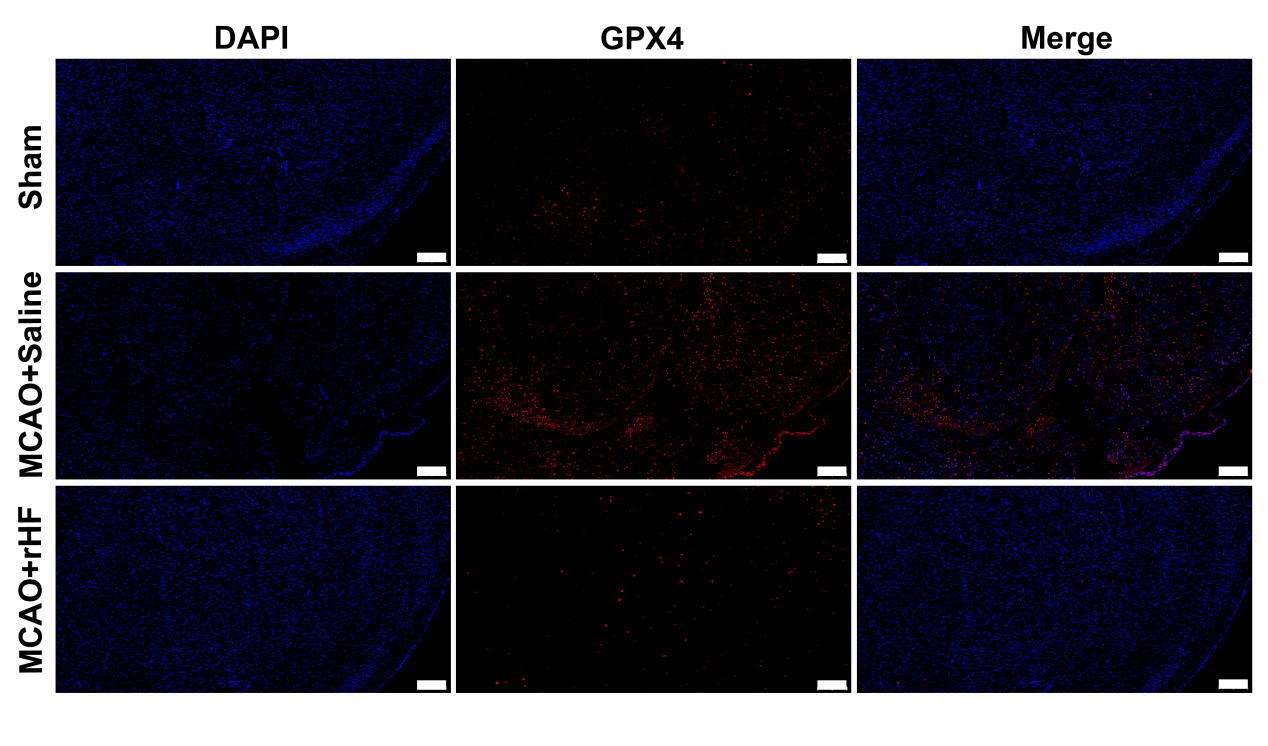


**Figure S7** GPX4 expression in wide-scan IF staining images of brain sections from different treatment groups (*n* = 3), Scale bar = 200 μm.


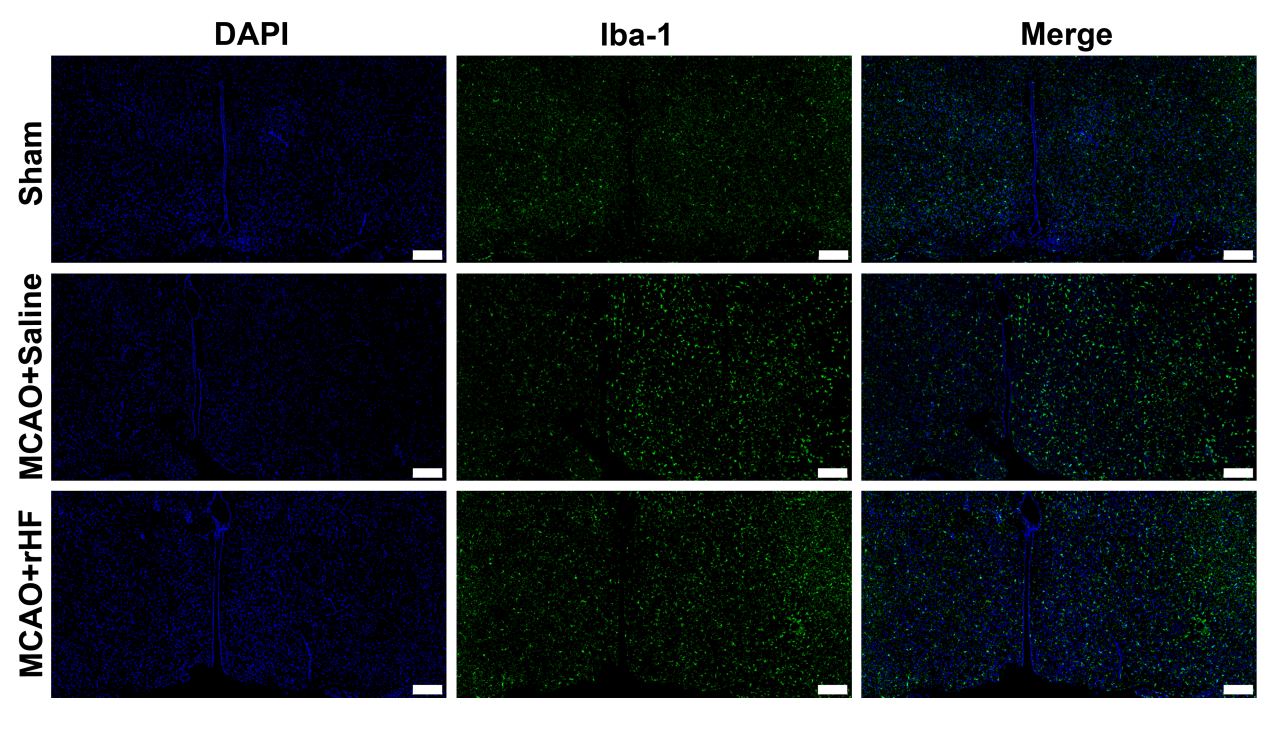


**Figure S8** Iba-1 expression in wide-scan IF staining images of brain sections from different treatment groups (*n* = 3), Scale bar = 200 μm.


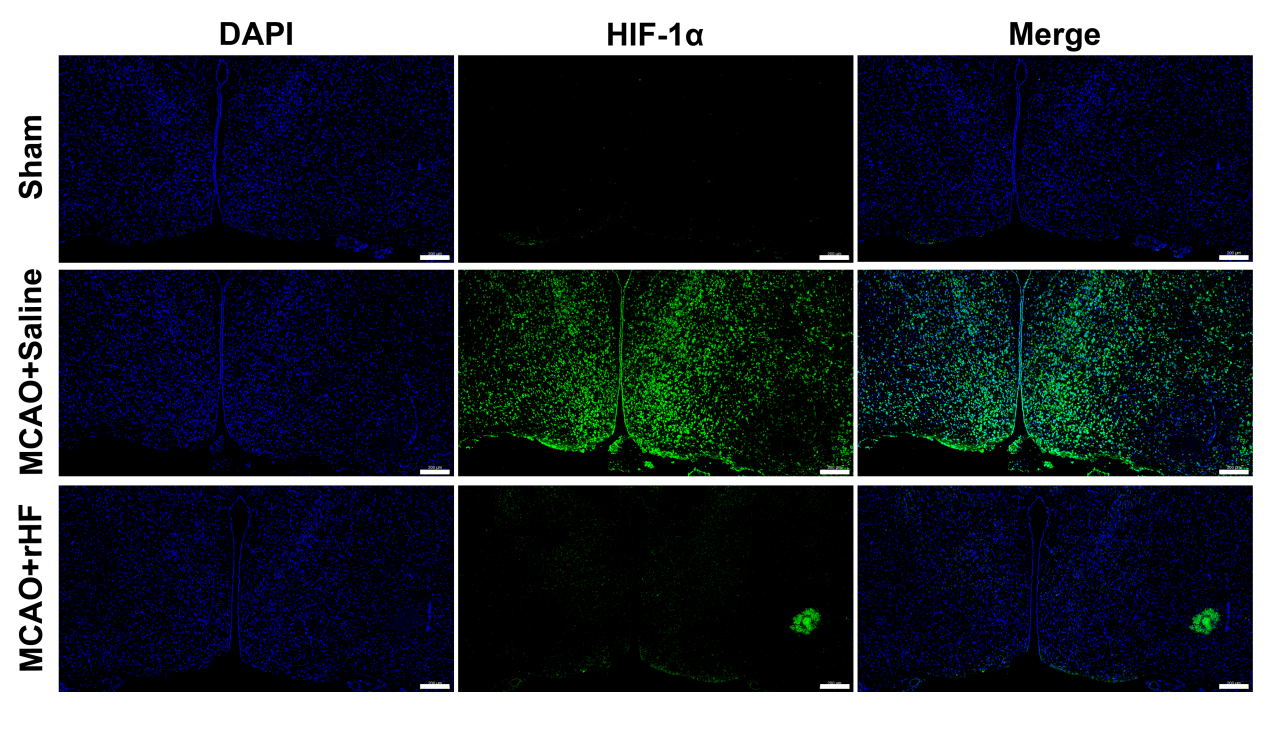


**Figure S9** HIF-1α expression in wide-scan IF staining images of brain sections from different treatment groups (*n* = 3), Scale bar = 200 μm.
